# Supplementary material for: A genomic‐based vision on the genetic diversity and key performance traits in selectively bred Arctic charr (Salvelinus alpinus)
Source: PubMed Central journal article supplement (PMC9046918; doi:10.1111/eva.13261), 2021-07-02

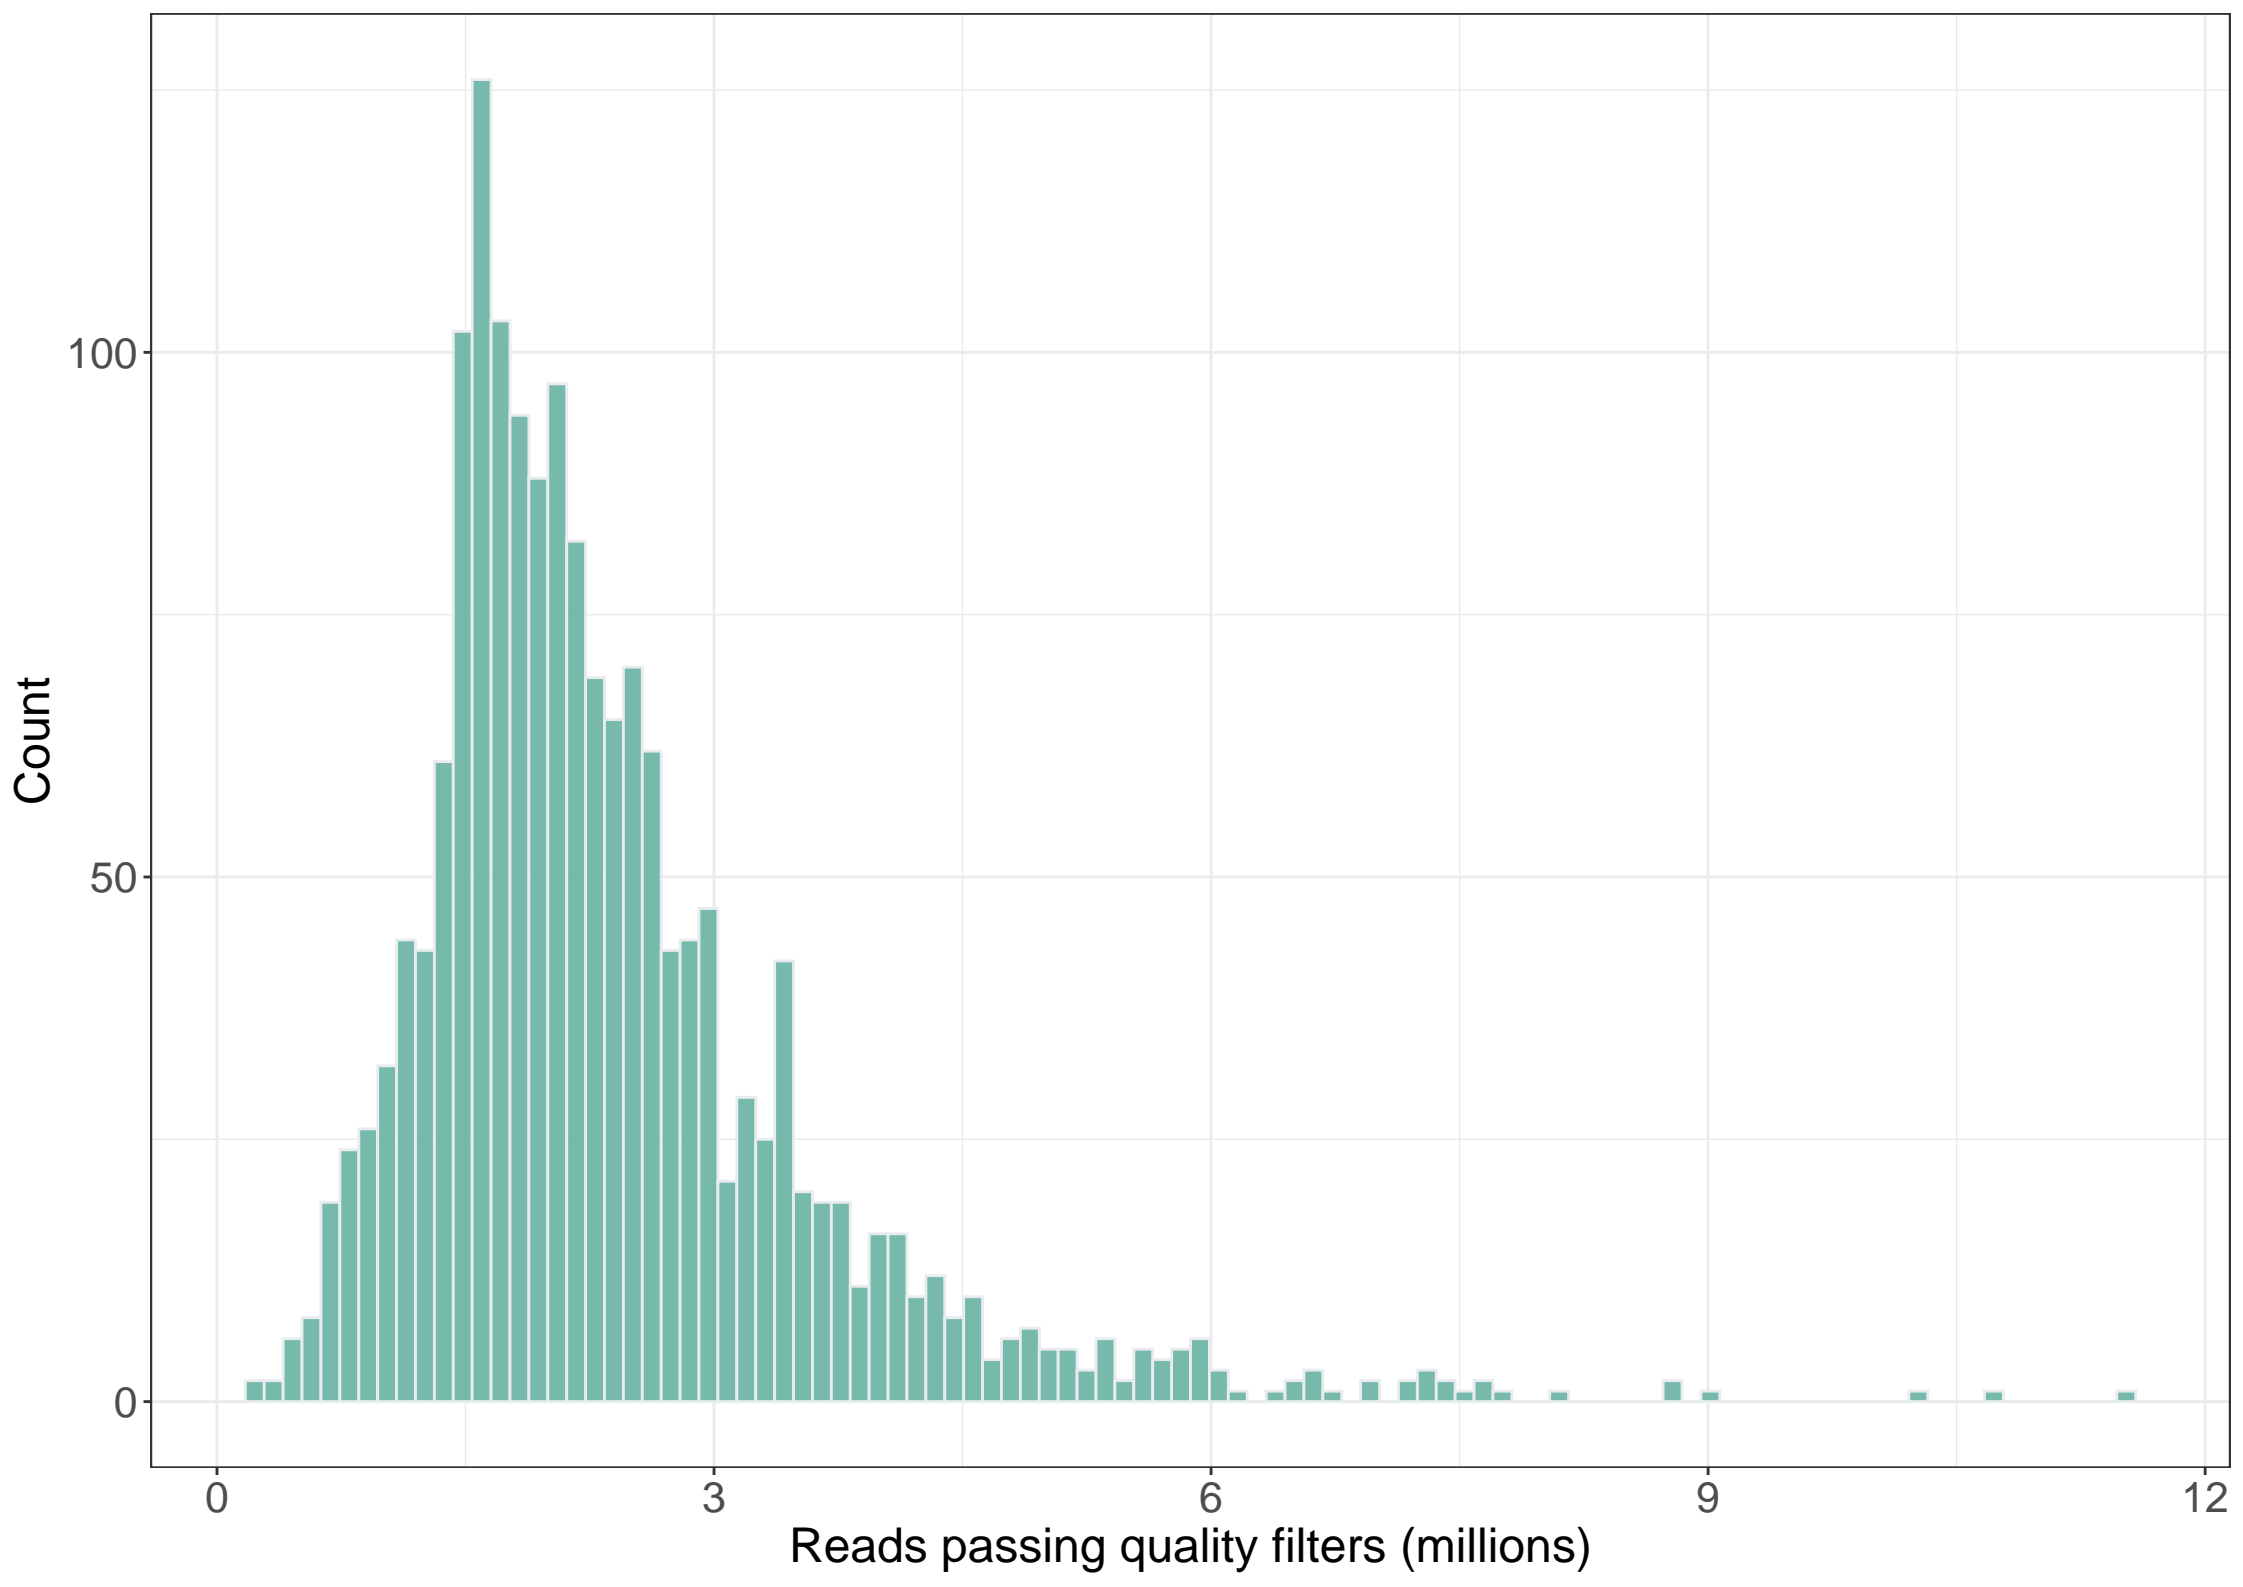

Supplement: EVA-15-565-s001.pdf [file EVA-15-565-s001.pdf]
